# Supplementary material for: Who Wants To Improve Collaboration in Services for Individuals with Chronic Conditions? Specialists and Rural General Practitioners Taking Action in a Fragmented Health Care System
Source: Research Square preprint supplement (doi:10.21203/rs.3.rs-778270/v1), 2021-09-15
Supplement: Supplementary file 1 [file 80243d61fb1cccb8b2009849.pdf]

*Appendix Table 1: German DOC questionnaire for GPs collaborating with specialists in general*

| Organisation                                                                                                               | Keine Zustimmung |   |   |   |   | Zustimmung |  |  |  |  |
|----------------------------------------------------------------------------------------------------------------------------|------------------|---|---|---|---|------------|--|--|--|--|
|                                                                                                                            | 1                | 2 | 3 | 4 | 5 |            |  |  |  |  |
| Ich finde ich arbeite gut mit Spezialisten zusammen.                                                                       |                  |   |   |   |   |            |  |  |  |  |
| Ich finde die gemeinsame Zusammenarbeit zwischen den Spezialisten ist gut.                                                 |                  |   |   |   |   |            |  |  |  |  |
| <i>Wartezeit: Zeitspanne zwischen der Überweisung durch den Hausarzt und der ersten Konsultation mit dem Spezialisten.</i> |                  |   |   |   |   |            |  |  |  |  |
| Ich finde die Wartezeiten für Patienten im Allgemeinen zu lang.                                                            |                  |   |   |   |   |            |  |  |  |  |
| Es gelingt mir, Probleme mit Wartezeiten zu vermeiden, indem ich Vereinbarungen mit Spezialisten treffe.                   |                  |   |   |   |   |            |  |  |  |  |
| <i>Warteliste: Zeitspanne zwischen Erstgespräch mit dem Spezialisten und Nachuntersuchung (Behandlung/Untersuchung)</i>    |                  |   |   |   |   |            |  |  |  |  |
| Ich finde derzeitige Wartelisten im Allgemeinen zu lang.                                                                   |                  |   |   |   |   |            |  |  |  |  |
| In der Regel habe ich Vereinbarungen mit Spezialisten, wann sie Patienten untereinander überweisen.                        |                  |   |   |   |   |            |  |  |  |  |
| In der Regel ist die Versorgung der Patienten nach der Entlassung durch den Spezialisten gut organisiert.                  |                  |   |   |   |   |            |  |  |  |  |
| Kommunikation                                                                                                              | Keine Zustimmung |   |   |   |   | Zustimmung |  |  |  |  |
|                                                                                                                            | 1                | 2 | 3 | 4 | 5 |            |  |  |  |  |
| Ich finde, dass der Input von Spezialisten bei Telefonaten in der Regel von guter Qualität ist.                            |                  |   |   |   |   |            |  |  |  |  |
| Ich empfinde das Vorgehen von Spezialisten bei Telefonaten als positiv.                                                    |                  |   |   |   |   |            |  |  |  |  |
| Ich schätze das Feedback des Spezialisten zur Art und Weise, wie ich mit Fällen umgehe.                                    |                  |   |   |   |   |            |  |  |  |  |
| Fachliche Expertise                                                                                                        | Keine Zustimmung |   |   |   |   | Zustimmung |  |  |  |  |
|                                                                                                                            | 1                | 2 | 3 | 4 | 5 |            |  |  |  |  |
| Ich möchte einen besseren Eindruck haben, wie der Spezialist arbeitet.                                                     |                  |   |   |   |   |            |  |  |  |  |
| Ich möchte, dass der Spezialist einen besseren Eindruck hat wie ich arbeite.                                               |                  |   |   |   |   |            |  |  |  |  |
| Ich möchte die Qualität meiner Überweisungen verbessern.                                                                   |                  |   |   |   |   |            |  |  |  |  |
| Ich finde die Qualität der Überweisung zurück an den Hausarzt sollte verbessert werden.                                    |                  |   |   |   |   |            |  |  |  |  |
| Image                                                                                                                      | Keine Zustimmung |   |   |   |   | Zustimmung |  |  |  |  |
|                                                                                                                            | 1                | 2 | 3 | 4 | 5 |            |  |  |  |  |
| Ich fühle mich selbstbewusst in meiner Zusammenarbeit mit Spezialisten.                                                    |                  |   |   |   |   |            |  |  |  |  |
| Ich fühle mich geschätzt in meiner Zusammenarbeit mit Spezialisten.                                                        |                  |   |   |   |   |            |  |  |  |  |
| Ich finde, dass Spezialisten auf mich herabblicken.                                                                        |                  |   |   |   |   |            |  |  |  |  |
| Sich gegenseitig kennen                                                                                                    | Keine Zustimmung |   |   |   |   | Zustimmung |  |  |  |  |
|                                                                                                                            | 1                | 2 | 3 | 4 | 5 |            |  |  |  |  |
| Wenn ich einen Spezialisten persönlich kenne, erhalten wir einen besseren Einblick in die Arbeit des jeweils anderen.      |                  |   |   |   |   |            |  |  |  |  |
| Wenn ich einen Spezialisten persönlich kenne, werden Kontakte einfacher und zugänglicher.                                  |                  |   |   |   |   |            |  |  |  |  |
| Wenn ich einen Spezialisten persönlich kenne, bekomme ich mehr Einblick in seine/ihre medizinische Expertise.              |                  |   |   |   |   |            |  |  |  |  |
