# Supplementary material for: Who Wants To Improve Collaboration in Services for Individuals with Chronic Conditions? Specialists and Rural General Practitioners Taking Action in a Fragmented Health Care System
Source: Research Square preprint supplement (doi:10.21203/rs.3.rs-778270/v1), 2021-09-15
Supplement: Supplementary file 2 [file ba59ceed3c6573b7b17b05c2.pdf]

Appendix Table 3: German DOC questionnaire for specialists collaborating with GPs

| Organisation                                                                                                                    | Keine Zustimmung |   |   |   |   | Zustimmung |  |  |  |  |
|---------------------------------------------------------------------------------------------------------------------------------|------------------|---|---|---|---|------------|--|--|--|--|
|                                                                                                                                 | 1                | 2 | 3 | 4 | 5 |            |  |  |  |  |
| Ich finde ich arbeite gut mit Hausärzten zusammen.                                                                              |                  |   |   |   |   |            |  |  |  |  |
| Ich finde, die gegenseitige Zusammenarbeit zwischen den Spezialisten ist gut in dem Krankenhaus, in dem ich arbeite.            |                  |   |   |   |   |            |  |  |  |  |
| <i>Wartezeit: Zeitspanne zwischen der Überweisung durch den Hausarzt und der ersten Konsultation mit dem Spezialisten.</i>      |                  |   |   |   |   |            |  |  |  |  |
| Ich finde die Wartezeiten für Patienten im Allgemeinen zu lang.                                                                 |                  |   |   |   |   |            |  |  |  |  |
| Es gelingt mir, Probleme mit Wartezeiten zu vermeiden, indem ich Vereinbarungen mit Hausärzten treffe.                          |                  |   |   |   |   |            |  |  |  |  |
| <i>Warteliste: Zeitspanne zwischen Erstgespräch mit dem Spezialisten und Nachuntersuchung (Behandlung/Untersuchung)</i>         |                  |   |   |   |   |            |  |  |  |  |
| Ich finde derzeitige Wartelisten für meine Patienten im Allgemeinen zu lang.                                                    |                  |   |   |   |   |            |  |  |  |  |
| In der Regel habe ich Vereinbarungen mit Hausärzten, wann ich Patienten an einen anderen Spezialisten überweise und wann nicht. |                  |   |   |   |   |            |  |  |  |  |
| Die Versorgung der Patienten nach der Entlassung ist von mir gut organisiert.                                                   |                  |   |   |   |   |            |  |  |  |  |
| Kommunikation                                                                                                                   | Keine Zustimmung |   |   |   |   | Zustimmung |  |  |  |  |
|                                                                                                                                 | 1                | 2 | 3 | 4 | 5 |            |  |  |  |  |
| Ich finde, dass der Input von Hausärzten bei Telefonaten in der Regel von guter Qualität ist.                                   |                  |   |   |   |   |            |  |  |  |  |
| Ich empfinde das Vorgehen von Hausärzten bei Telefonaten als positiv.                                                           |                  |   |   |   |   |            |  |  |  |  |
| Ich schätze das Feedback der Hausärzte zur Art und Weise, wie ich mit Fällen umgehe.                                            |                  |   |   |   |   |            |  |  |  |  |
| Fachliche Expertise                                                                                                             | Keine Zustimmung |   |   |   |   | Zustimmung |  |  |  |  |
|                                                                                                                                 | 1                | 2 | 3 | 4 | 5 |            |  |  |  |  |
| Ich möchte einen besseren Eindruck haben, wie der Hausarzt arbeitet.                                                            |                  |   |   |   |   |            |  |  |  |  |
| Ich möchte, dass der Hausarzt einen besseren Eindruck hat wie ich arbeite.                                                      |                  |   |   |   |   |            |  |  |  |  |
| Ich finde, die Qualität der Überweisungen von der Primär- zur Sekundärversorgung sollte verbessert werden.                      |                  |   |   |   |   |            |  |  |  |  |
| Ich möchte die Qualität meiner Überweisungen zurück an den Hausarzt verbessern.                                                 |                  |   |   |   |   |            |  |  |  |  |
| Image                                                                                                                           | Keine Zustimmung |   |   |   |   | Zustimmung |  |  |  |  |
|                                                                                                                                 | 1                | 2 | 3 | 4 | 5 |            |  |  |  |  |
| Ich fühle mich selbstbewusst in meiner Zusammenarbeit mit Hausärzten.                                                           |                  |   |   |   |   |            |  |  |  |  |
| Ich fühle mich geschätzt in meiner Zusammenarbeit mit Hausärzten.                                                               |                  |   |   |   |   |            |  |  |  |  |
| Ich finde, dass Hausärzte auf mich herabblicken.                                                                                |                  |   |   |   |   |            |  |  |  |  |
| Sich gegenseitig kennen                                                                                                         | Keine Zustimmung |   |   |   |   | Zustimmung |  |  |  |  |
|                                                                                                                                 | 1                | 2 | 3 | 4 | 5 |            |  |  |  |  |
| Wenn Ich einen Hausarzt persönlich kenne, erhalten wir einen besseren Einblick in die Arbeit des jeweils anderen.               |                  |   |   |   |   |            |  |  |  |  |
| Wenn ich einen Hausarzt persönlich kenne, werden Kontakte einfacher und zugänglicher.                                           |                  |   |   |   |   |            |  |  |  |  |
| Wenn Ich einen Hausarzt persönlich kenne, bekomme Ich mehr Einblick in seine/ihre medizinische Expertise.                       |                  |   |   |   |   |            |  |  |  |  |
