# Supplementary material for: Who Wants To Improve Collaboration in Services for Individuals with Chronic Conditions? Specialists and Rural General Practitioners Taking Action in a Fragmented Health Care System
Source: Research Square preprint supplement (doi:10.21203/rs.3.rs-778270/v1), 2021-09-15
Supplement: Supplementary file 3 [file e3612b5644584817d5c65bbd.pdf]

*Appendix Table 2: German DOC questionnaire for GPs collaborating with specialists for spinal cord injury (SCI)*

| Organisation                                                                                                                                 | Keine Zustimmung |   | Zustimmung |   |   |
|----------------------------------------------------------------------------------------------------------------------------------------------|------------------|---|------------|---|---|
|                                                                                                                                              | 1                | 2 | 3          | 4 | 5 |
| Ich finde ich arbeite gut mit Spezialisten für Querschnittlähmung zusammen.                                                                  |                  |   |            |   |   |
| Ich finde die gemeinsame Zusammenarbeit zwischen den Spezialisten für Querschnittlähmung ist gut.                                            |                  |   |            |   |   |
| <i>Wartezeit: Zeitspanne zwischen der Überweisung durch den Hausarzt und der ersten Konsultation mit dem Spezialisten.</i>                   |                  |   |            |   |   |
| Ich finde die Wartezeiten für Patienten im Allgemeinen zu lang.                                                                              |                  |   |            |   |   |
| Es gelingt mir, Probleme mit Wartezeiten zu vermeiden, indem ich Vereinbarungen mit Spezialisten für Querschnittlähmung treffe.              |                  |   |            |   |   |
| <i>Warteliste: Zeitspanne zwischen Erstgespräch mit dem Spezialisten und Nachuntersuchung (Behandlung/Untersuchung)</i>                      |                  |   |            |   |   |
| Ich finde derzeitige Wartelisten im Allgemeinen zu lang.                                                                                     |                  |   |            |   |   |
| In der Regel habe ich Vereinbarungen mit Spezialisten für Querschnittlähmung, wann sie Patienten untereinander überweisen.                   |                  |   |            |   |   |
| In der Regel ist die Versorgung der Patienten nach der Entlassung durch den Spezialisten für Querschnittlähmung gut organisiert.             |                  |   |            |   |   |
| Kommunikation                                                                                                                                | Keine Zustimmung |   | Zustimmung |   |   |
|                                                                                                                                              | 1                | 2 | 3          | 4 | 5 |
| Ich finde, dass der Input von Spezialisten für Querschnittlähmung bei Telefonaten in der Regel von guter Qualität ist.                       |                  |   |            |   |   |
| Ich empfinde das Vorgehen von Spezialisten für Querschnittlähmung bei Telefonaten als positiv.                                               |                  |   |            |   |   |
| Ich schätze das Feedback des Spezialisten für Querschnittlähmung zur Art und Weise, wie ich mit Fällen umgehe.                               |                  |   |            |   |   |
| Fachliche Expertise                                                                                                                          | Keine Zustimmung |   | Zustimmung |   |   |
|                                                                                                                                              | 1                | 2 | 3          | 4 | 5 |
| Ich möchte einen besseren Eindruck haben, wie der Spezialist für Querschnittlähmung arbeitet.                                                |                  |   |            |   |   |
| Ich möchte, dass der Spezialist einen besseren Eindruck hat wie ich arbeite.                                                                 |                  |   |            |   |   |
| Ich möchte die Qualität meiner Überweisungen verbessern.                                                                                     |                  |   |            |   |   |
| Ich finde die Qualität der Überweisung zurück an den Hausarzt sollte verbessert werden.                                                      |                  |   |            |   |   |
| Image                                                                                                                                        | Keine Zustimmung |   | Zustimmung |   |   |
|                                                                                                                                              | 1                | 2 | 3          | 4 | 5 |
| Ich fühle mich selbstbewusst in meiner Zusammenarbeit mit Spezialisten für Querschnittlähmung.                                               |                  |   |            |   |   |
| Ich fühle mich geschätzt in meiner Zusammenarbeit mit Spezialisten für Querschnittlähmung.                                                   |                  |   |            |   |   |
| Ich finde, dass Spezialisten für Querschnittlähmung auf mich herabblicken.                                                                   |                  |   |            |   |   |
| Sich gegenseitig kennen                                                                                                                      | Keine Zustimmung |   | Zustimmung |   |   |
|                                                                                                                                              | 1                | 2 | 3          | 4 | 5 |
| Wenn ich einen Spezialisten für Querschnittlähmung persönlich kenne, erhalten wir einen besseren Einblick in die Arbeit des jeweils anderen. |                  |   |            |   |   |
| Wenn ich einen Spezialisten für Querschnittlähmung persönlich kenne, werden Kontakte einfacher und zugänglicher.                             |                  |   |            |   |   |
| Wenn ich einen Spezialisten für Querschnittlähmung persönlich kenne, bekomme ich mehr Einblick in seine/ihre medizinische Expertise.         |                  |   |            |   |   |
